# Supplementary material for: Behavioral, morphological, and ecological trait evolution in two clades of New World Sparrows (Aimophila and Peucaea, Passerellidae)
Source: PeerJ. 2020 Jun 19;8:e9249. doi: 10.7717/peerj.9249 (PMC7307569; doi:10.7717/peerj.9249)
Supplement: Table S1 — List of species, specimens, and GenBank numbers used in this study. Institutional codes are: MMNH, Bell Museum of Natural History, University of Minnesota; CNAV, Colección Nacional de Aves, Instituto de Biología, Universidad Nacional Autónoma de México; KUMNH, Biodiversity Institute and Natural History Museum, University of Kansas; LSUMZ, Museum of Natural Science, Louisiana State University; MBM, Marjorie Barrick Museum, University of Nevada Las Vegas (specimens transferred to UWBM); MVZ, Museum of Vertebrate Zoology, University of California Berkeley; MZFC, Museo de Zoología de la Facultad de Ciencias, Universidad Nacional Autónoma de México; NCSM, North Carolina State Museum; ROM, Royal Ontario Museum; STRI, Smithsonian Tropical Research Institute; UWBM, Burke Museum of Natural History and Culture, University of Washington. [file peerj-08-9249-s003.xlsx]

## Sheet: Sheet1
Table S1. Samples and Genbank numbers. List of species, specimens, and GenBank numbers used in this study. Institutional codes are: MMNH, Bell Museum of Natural History, University of Minnesota; CNAV, Colección Nacional de Aves, Instituto de Biología, Universidad Nacional Autónoma de México; KUMNH, Biodiversity Institute and Natural History Museum, University of Kansas; LSUMZ, Museum of Natural S…
Taxon	Specimen number	Location	Cyt b	ND2	CO I	ATPase8	Fib5	TGFb2	RAG1
Peucaea aestivalis	LSUMZ B2461/109105	USA: Louisiana	MN593812	MN593758	MN611823	MN611767	MN638370	MN638315	MN611879
P. aestivalis	LSUMZ B13499/NCSM 15013	USA: North Carolina	MN593813	MN593759	MN611824	MN611768	MN638371	MN638316	MN611880
P.aestivalis	ROM 157827	USA: Georgia	MN593814	MN593760	MN611825	MN611769	MN638372	MN638317	MN611881
P. botterii	ROM 157814	USA: Arizona	MN593815	MN593761	MN611826	MN611770	MN638373	MN638318	MN611882
P. botterii	ROM 157816	USA: Arizona	MN593816	MN593762	MN611827	MN611771	MN638374	MN638319	MN611883
P. botterii	LSUMZ B23937/ROM 157813	USA: Arizona	MN593817	MN593763	MN611828	MN611772	MN638375	MN638320	MN611884
P. carpalis	ROM 160278	USA: Arizona	MN593818	MN593764	MN611829	MN611773	MN638376	MN638321	MN611885
P. carpalis	ROM 160281	USA: Arizona	MN593819	MN593765	MN611830	MN611774	MN638377	MN638322	MN611886
P. cassinii	ROM 157190	USA: Kansas	MN593820	MN593766	MN611831	MN611775	MN638378	MN638323	MN611887
P. cassinii	MVZ 178273	USA: Oklahoma	MN593821	MN593767	MN611832	MN611776	MN638379	MN638324	MN611888
P. humeralis	ROM 160211	Mexico: Jalisco	MN593822	MN593768	MN611833	MN611777	MN638380	MN638325	MN611889
P. humeralis	MZFC 16433	Mexico: Colima	MN593823	MN593769	MN611834	MN611778	MN638381	MN638326	MN611890
P. humeralis	MZFC 16434	Mexico: Colima	MN593824	MN593770	MN611835	MN611779	MN638382	MN638327	MN611891
P. mystacalis	MZFC 12417	Mexico: Oaxaca	MN593825	MN593771	MN611836	MN611780	MN638383	MN638328	MN611892
P. mystacalis	MZFC 23289	Mexico: Oaxaca	--	MN593772	MN611837	MN611781	MN638384	MN638329	--
P. mystacalis	MZFC OMVP 773	Mexico: Puebla	FJ547266	FJ547307	--	--	--	--	--
P. ruficauda	ROM 160213	Mexico: Jalisco	MN593827	MN593774	MN611839	MN611783	MN638386	MN638331	MN611894
P. ruficauda	ROM 160214	Mexico: Jalisco	MN593826	MN593773	MN611838	MN611782	MN638385	MN638330	MN611893
P. ruficauda	MBM 4599/UWBM 69323	Nicaragua: Rivas	FJ547263	FJ547304	--	--	--	--	--
P. ruficauda	CNAV 013223	Mexico: Oaxaca	FJ547264	FJ547305	--	--	--	--	--
P. sumichrasti	MZFC 17145	Mexico: Oaxaca	MN593829	MN593776	MN611841	MN611785	MN638388	MN638333	MN611896
P. sumichrasti	MZFC 17146	Mexico: Oaxaca	MN593828	MN593775	MN611840	MN611784	MN638387	MN638332	MN611895
Aimophila notosticta	MZFC 14796	Mexico: Distrito Federal	MN593830	MN593777	--	MN611786	MN638389	MN638334	MN611897
A. notosticta	MZFC 14801	Mexico: Distrito Federal	MN593831	MN593778	--	MN611787	MN638390	MN638335	MN611898
A. rufescens	FMNH 394022	Mexico: Oaxaca	MN593832	MN593779	MN611842	MN611788	MN638391	MN638336	MN611899
A. rufescens	FMNH 393869	Mexico: Jalisco	MN593833	MN593780	MN611843	MN611789	MN638392	MN638337	MN611900
A. rufescens	MBM 7067/UWBM 93598	Honduras: Copan	MN593834	MN593781	MN611844	--	MN638393	MN638338	MN611901
A. ruficeps	ROM 157819	USA: Arizona	MN593835	MN593782	MN611845	MN611790	MN638394	MN638339	MN611902
A. ruficeps	MVZ 179474	USA: California	MN593836	MN593783	MN611846	MN611791	MN638395	MN638340	MN611903
A. ruficeps	LSUMZ B3788/127193	Mexico: Baja California Sur	MN593837	MN593784	MN611847	MN611792	MN638396	MN638341	MN611904
Rhynchospiza strigiceps	LSUMZ B18741/153813	Bolivia: Santa Cruz	MN593838	MN593785	MN611848	MN611793	MN638397	MN638342	MN611905
R. strigiceps	LSUMZ B19112/153816	Bolivia: Santa Cruz	MN593839	MN593786	MN611849	MN611794	MN638398	MN638343	MN611906
R. stolzmanni	LSUMZ B5195/113881	Peru: Lambayeque	MN593840	MN593787	MN611850	MN611795	MN638399	MN638344	MN611907
R. stolzmanni	LSUMZ B5227/114322	Peru: Lambayeque	MN593841	MN593788	MN611851	MN611796	MN638400	MN638345	MN611908
Amphispiza bilineata	ROM 160285	USA: Arizona	MN593842	MN593789	MN611852	MN611797	MN638401	MN638346	MN611909
A. bilineata	MVZ 169968	USA: Nevada	MH460933	MH460899	MN611853	MN611798	MN638402	MN638347	MN611910
A. bilineata	MVZ 171161	USA: California	MN593844	MN593791	MN611854	MN611799	MN638403	MN638348	MN611911
A. quinquestriata	MZFC ORS 109	Mexico: Sonora	MN593845	MN593792	MN611855	MN611800	--	--	--
A. quinquestriata	MZFC 15422	Mexico: Sinaloa	MN593846	MN593793	MN611856	MN611801	MN638404	MN638349	MN611912
Artemisiospiza belli	MVZ 170008	USA: California	JX218165	MH460909	--	--	--	MN638351	MN611913
Artemisiospiza belli	MVZ 170251	USA: California	JX218153	MH460901	--	--	MN638405	MN638350	MN611914
Arremon taciturnus	FMNH 323602	Peru: Cuzco	MN593847	MN593794	MN611857	MN611802	MN638406	MN638352	MN611915
Arremon taciturnus	FMNH 392381	Peru: Pernambuco	MN593848	MN593795	MN611858	MN611803	MN638407	MN638353	MN611916
Arremon aurantiirostris	MBM 7856/UWBM 93635	Honduras: Copan	EF529940	EF529829	--	--	--	--	--
Arremon flavirostris	UWBM 70175	Argentina: Corrientes	FJ547252	FJ547293	--	--	--	--	--
Chondestes grammacus	MVZ 179475	USA: California	MN593849	MN593796	MN611859	MN611804	MN638408	MN638354	MN611917
Chondestes grammacus	ROM 157180	USA: Kansas	MN593850	MN593797	MN611860	MN611805	MN638409	MN638355	MN611918
Melozone biarcuata	FMNH 434115	El Salvador: Sonsonate	MN593851	MN593798	MN611861	MN611806	MN638410	MN638356	MN611919
Melozone biarcuata	MBM 10528/UWBM 109885	Guatemala: Quetzaltenango	FJ547257	FJ547298	--	--	--	--	--
Melozone kieneri	FMNH 343332	Mexico: Jalisco	MN593852	MN593799	MN611862	--	MN638411	MN638357	MN611920
Melozone leucotis	MBM 10538/UWBM 109906	Guatemala: Quetzaltenango	DQ459517	DQ459537	--	--	--	--	--
Melozone crissalis	MVZ 177921	USA: California	MN593853	MN593800	MN611863	MN611807	MN638412	MN638358	MN611921
Melozone crissalis	MBM 13154/UWBM 105099	USA: California	FJ547262	FJ547303	--	--	--	--	--
Melozone fusca	MVZ 178298	USA: Oklahoma	MN593854	MN593801	MN611864	MN611808	MN638413	MN638359	MN611922
Melozone fusca	LSUMZ B-13402/139136	USA: Arizona	EF529937	AF290123	--	--	--	--	--
Oriturus superciliosus	FMNH 343328	Mexico: Morelos	MN593855	MN593802	MN611865	MN611809	MN638414	MN638360	MN611923
Oriturus superciliosus	FMNH 393888	Mexico: Morelos	MN593856	MN593803	MN611866	MN611810	MN638415	MN638361	--
Spizella atrogularis	MVZ 169967	USA: California	MN593857	MN593804	MN611867	MN611811	MN638416	MN638362	MN611924
Spizella atrogularis	MVZ 170231	USA: California	MN593858	MN593805	MN611868	MN611812	MN638417	MN638363	MN611925
Spizella passerina	LSUMZ B18047/152469	Canada: Yukon	FJ547278	FJ547319	--	--	--	--	--
Spizella pallida	MMNH 45971	USA: Minnesota	FJ547279	FJ547320	--	--	--	--	--
Pipilo maculatus	MVZ 177601	USA: California	MN593859	MN593806	MN611869	MN611813	MN638418	MN638364	MN611926
Pipilo maculatus	MBM 8379/UWBM 98298	USA: Nevada	FJ547259	FJ547300	--	--	--	--	--
Pipilo erythrophthalmus	UWBM 120436	USA: Minnesota	FJ547260	FJ547301	--	--	--	--	--
Pipilo chlorurus	LSUMZ B13415/139139	USA: Nevada	FJ547258	FJ547299	--	--	--	--	--
Pipilo ocai	FMNH 343329	Mexico: Jalisco	DQ459518	DQ459538	--	--	--	--	--
Pooecetes gramineus	MVZ 170232	USA: California	MN593860	MN593807	MN611870	MN611814	MN638419	MN638365	MN611927
Pooecetes gramineus	BMNH 43743	USA: Montana	DQ459508	DQ459528	--	--	--	--	--
Ammodramus savannarum	MVZ 178277	USA: Oklahoma	MN593861	MN593808	MN611871	MN611815	MN638420	MN638366	MN611928
Ammodramus savannarum	MVZ 178278	USA: Oklahoma	MN593862	MN593809	MN611872	MN611816	MN638421	MN638367	MN611929
Ammodramus humeralis	KUMNH 90036	Paraguay: Boqueron	MN593863	MN593810	MN611873	MN611817	MN638422	MN638368	MN611930
Ammodramus humeralis	MBM 5454/UWBM 92150	Argentina: Salta	FJ547283	FJ547324	--	--	--	--	--
Ammospiza lecontei	BMNH 43269	USA: Minnesota	DQ459512	DQ459532	--	--	--	--	--
Ammospiza nelsoni	BMNH 43267	USA: Minnesota	DQ459522	DQ459542	--	--	--	--	--
Passerculus sandwichensis	MVZ 171661	USA: California	MN593864	MN593811	MN611874	MN611818	MN638423	MN638369	MN611931
Passerculus sandwichensis	BMNH 43742	USA: Montana	DQ459513	DQ459533	--	--	--	--	--
Arremonops rufivirgatus	BMNH 43282	USA: Texas	FJ547253	FJ547294	--	--	--	--	--
Arremonops conirostris	MBM 4422/UWBM 69974	Nicaragua: Atlantico Norte	FJ547255	FJ547296	--	--	--	--	--
Zonotrichia albicollis	LSUMNS B15522/139408	USA: Louisiana	FJ547286	FJ547327	--	--	--	--	--
Zonotrichia capensis	MBM 10605/UWBM 105909	Guatemala: Quetzaltenango	FJ547285	FJ547326	--	--	--	--	--
Setophaga tigrina	STRI JA-DTI1	Jamaica: Saint Elizabeth	AF256505	AF256493	--	--	--	--	--
Protonotaria citrea	BMNH 42726	USA: Minnesota	FJ547289	FJ547330	--	--	--	--	--
Molothrus ater	BMNH JK96-016	USA: Minnesota	EF529951	EF529840	--	--	--	--	--
Icterus bullockii	BMNH 43762	USA: Oregon	EF529950	EF529839	--	--	--	--	--
